# Supplementary material
Source: Research Square preprint supplement (doi:10.21203/rs.3.rs-9297107/v1)
Supplement: Supplementary file 1 [file 8c3124aa16c94597d519e58b.xlsx]

## Sheet: Content
	Sheet	Title
	ST 1	RM mitophagy-related genes
	ST 2	RM mitophagy-related diagnostic marker genes
	ST 3	PPI network of RM mitophagy-related diagnostic marker genes
	ST 4	The result of mRNA-TF network
	ST 5	The result of mRNA-miRNA network
	ST 6	GO/KEGG enrichment analyses
	ST 7	GSEA enrichment analyses
	Note
	ST	Supplementary table
	RM	Recurrent Miscarriage
	PPI	Protein-protein Interaction
	TF	Transcription Factors
	GO	Gene Ontology
	KEGG	Kyoto Encyclopedia of Genes and Genomes
	GSEA	Gene Set Enrichment Analysis

## Sheet: ST 1
ST 1. RM mitophagy-related genes
FKBP8	GSN
BCL2	IL6R
KRAS	ACTA2
BAG4	PFN1
VPS37A	SMC1A
SYNJ2BP	DNAJC7
ARMCX3	FGFR1
MYLK	EMD
BLOC1S1	RPS12
MRPL35	PRICKLE2

## Sheet: ST 2
ST 2. RM mitophagy-related diagnostic marker genes
BCL2	GSN
KRAS	IL6R
VPS37A	ACTA2
ARMCX3	DNAJC7
SYNJ2BP	FGFR1
MYLK	EMD
BLOC1S1	RPS12
MRPL35	PRICKLE2

## Sheet: ST 3
ST 3. PPI network of RM mitophagy-related diagnostic marker genes
node1	node2
ACTA2	KRAS
ACTA2	MYLK
ACTA2	EMD
ACTA2	GSN
ACTA2	FGFR1
ARMCX3	VPS37A
BCL2	KRAS
FGFR1	KRAS
FGFR1	IL6R
GSN	KRAS
GSN	MYLK
IL6R	KRAS
KRAS	PRICKLE2
KRAS	MYLK
MRPL35	VPS37A
MYLK	VPS37A
PPI：Protein-Protein Interaction Network

## Sheet: ST 4
ST 4. The result of mRNA-TF network
mRNA	TF
ACTA2	FLI1
ACTA2	FOXA1
ACTA2	ETV1
ACTA2	FOSL1
ACTA2	CREB1
ACTA2	ERG
ACTA2	BACH1
ARMCX3	FLI1
BCL2	FOS
BCL2	GATA3
BCL2	JUN
BCL2	GABPA
BLOC1S1	FLI1
BLOC1S1	JUN
DNAJC7	FLI1
DNAJC7	JUN
DNAJC7	NFYA
DNAJC7	ARNT
FGFR1	GABPA
GSN	CREB1
GSN	FLI1
GSN	FOXA1
GSN	GABPA
GSN	GATA1
GSN	JUN
GSN	MYB
GSN	NFYB
GSN	NR2F2
GSN	RNF2
IL6R	ATF3
IL6R	FOXA1
IL6R	GABPA
IL6R	GATA1
IL6R	EWSR1
IL6R	JUN
IL6R	JUND
IL6R	MYB
IL6R	RNF2
MRPL35	FLI1
MRPL35	GABPA
MYLK	FLI1
MYLK	MYB
MYLK	GABPA
MYLK	ERG
MYLK	FOXA1
MYLK	ATF3
MYLK	CTCF
PRICKLE2	NR2F2
PRICKLE2	FOXM1
PRICKLE2	GATA3
VPS37A	GABPA
VPS37A	GATA1
TF：Transcription factor

## Sheet: ST 5
ST 5. The result of mRNA-miRNA network
mRNA	miRNA
ARMCX3	hsa-miR-3145-3p
ARMCX3	hsa-miR-577
ARMCX3	hsa-miR-4761-5p
ARMCX3	hsa-miR-455-5p
BCL2	hsa-miR-15a-5p
BCL2	hsa-miR-16-5p
BCL2	hsa-miR-96-5p
BCL2	hsa-miR-139-5p
BCL2	hsa-miR-34a-5p
BCL2	hsa-miR-181a-5p
BCL2	hsa-miR-181b-5p
BCL2	hsa-miR-181c-5p
BCL2	hsa-miR-182-5p
BCL2	hsa-miR-204-5p
BCL2	hsa-miR-211-5p
BCL2	hsa-miR-15b-5p
BCL2	hsa-miR-125b-5p
BCL2	hsa-miR-143-3p
BCL2	hsa-miR-153-3p
BCL2	hsa-miR-125a-5p
BCL2	hsa-miR-195-5p
BCL2	hsa-miR-34c-5p
BCL2	hsa-miR-365a-3p
BCL2	hsa-miR-448
BCL2	hsa-miR-449a
BCL2	hsa-miR-497-5p
BCL2	hsa-miR-181d-5p
BCL2	hsa-miR-4319
BCL2	hsa-miR-4761-3p
DNAJC7	hsa-miR-181a-5p
DNAJC7	hsa-miR-1321
DNAJC7	hsa-miR-4262
DNAJC7	hsa-miR-4739
DNAJC7	hsa-miR-4756-5p
FGFR1	hsa-miR-16-5p
FGFR1	hsa-miR-424-5p
FGFR1	hsa-miR-214-3p
FGFR1	hsa-miR-3619-5p
FGFR1	hsa-miR-330-3p
FGFR1	hsa-miR-761
FGFR1	hsa-miR-3150a-3p
FGFR1	hsa-miR-133b
GSN	hsa-miR-124-3p
GSN	hsa-miR-450b-5p
IL6R	hsa-miR-21-5p
IL6R	hsa-miR-23a-3p
IL6R	hsa-miR-34a-5p
IL6R	hsa-miR-125b-5p
IL6R	hsa-miR-34c-5p
IL6R	hsa-miR-513a-5p
IL6R	hsa-miR-23c
KRAS	hsa-miR-27a-3p
KRAS	hsa-miR-96-5p
KRAS	hsa-miR-199a-5p
KRAS	hsa-miR-181a-5p
KRAS	hsa-miR-181c-5p
KRAS	hsa-miR-199b-5p
KRAS	hsa-miR-1-3p
KRAS	hsa-miR-142-5p
KRAS	hsa-miR-143-3p
KRAS	hsa-miR-134-5p
KRAS	hsa-miR-193a-3p
KRAS	hsa-miR-206
KRAS	hsa-miR-155-5p
KRAS	hsa-miR-337-3p
KRAS	hsa-miR-326
KRAS	hsa-miR-433-3p
KRAS	hsa-miR-193b-3p
KRAS	hsa-miR-671-5p
KRAS	hsa-miR-340-5p
KRAS	hsa-miR-330-5p
KRAS	hsa-miR-877-5p
KRAS	hsa-miR-543
KRAS	hsa-miR-1197
KRAS	hsa-miR-3924
MRPL35	hsa-miR-18a-5p
MRPL35	hsa-miR-129-5p
MRPL35	hsa-miR-362-5p
MRPL35	hsa-miR-18b-5p
MRPL35	hsa-miR-193a-5p
MRPL35	hsa-miR-501-3p
MRPL35	hsa-miR-502-3p
MRPL35	hsa-miR-450b-5p
MRPL35	hsa-miR-1297
MRPL35	hsa-miR-3163
MRPL35	hsa-miR-4735-3p
MYLK	hsa-miR-7-5p
MYLK	hsa-miR-577
MYLK	hsa-miR-4306
MYLK	hsa-miR-155-5p
MYLK	hsa-miR-409-3p
MYLK	hsa-miR-3179
MYLK	hsa-miR-9-5p
MYLK	hsa-miR-4644
PRICKLE2	hsa-miR-19a-3p
PRICKLE2	hsa-miR-19b-3p
PRICKLE2	hsa-miR-520h
PRICKLE2	hsa-miR-520g-3p
PRICKLE2	hsa-miR-520d-5p
PRICKLE2	hsa-miR-524-5p
PRICKLE2	hsa-miR-361-5p
PRICKLE2	hsa-miR-450b-5p
PRICKLE2	hsa-miR-3619-5p
PRICKLE2	hsa-miR-518b
PRICKLE2	hsa-miR-518d-3p
PRICKLE2	hsa-miR-518a-3p
PRICKLE2	hsa-miR-761
PRICKLE2	hsa-miR-330-5p
PRICKLE2	hsa-miR-3163
PRICKLE2	hsa-miR-4262
PRICKLE2	hsa-miR-514b-5p
PRICKLE2	hsa-miR-4766-5p
PRICKLE2	hsa-miR-3164
PRICKLE2	hsa-miR-1224-5p
PRICKLE2	hsa-miR-326
PRICKLE2	hsa-miR-3679-5p
PRICKLE2	hsa-miR-346
PRICKLE2	hsa-miR-3666
PRICKLE2	hsa-miR-4295
SYNJ2BP	hsa-miR-150-5p
SYNJ2BP	hsa-miR-512-3p
SYNJ2BP	hsa-miR-552-3p
SYNJ2BP	hsa-miR-542-3p
SYNJ2BP	hsa-miR-532-3p
SYNJ2BP	hsa-miR-934
SYNJ2BP	hsa-miR-302e
SYNJ2BP	hsa-miR-4770
VPS37A	hsa-miR-19a-3p
VPS37A	hsa-miR-19b-3p
VPS37A	hsa-miR-148a-3p
VPS37A	hsa-miR-130a-3p
VPS37A	hsa-miR-152-3p
VPS37A	hsa-miR-301a-3p
VPS37A	hsa-miR-130b-3p
VPS37A	hsa-miR-148b-3p
VPS37A	hsa-miR-454-3p
VPS37A	hsa-miR-301b-3p
VPS37A	hsa-miR-513c-5p
VPS37A	hsa-miR-3140-3p
VPS37A	hsa-miR-3163
VPS37A	hsa-miR-514b-5p
VPS37A	hsa-miR-4295
VPS37A	hsa-miR-3666

## Sheet: ST 6
ST 6. GO/KEGG enrichment analyses
ONTOLOGY	ID	Description	pvalue	p.adjust	qvalue
BP	GO:0001655	urogenital system development	0.000147455	0.0249664	0.0152507
BP	GO:0007568	aging	0.002388	0.0758754	0.0463483
BP	GO:2001233	regulation of apoptotic signaling pathway	0.00463042	0.0969644	0.0592305
CC	GO:0005741	mitochondrial outer membrane	0.000371549	0.00847132	0.00555369
CC	GO:0032592	integral component of mitochondrial membrane	0.00156887	0.0184963	0.0121259
CC	GO:0031300	intrinsic component of organelle membrane	0.0154518	0.0793597	0.0520271
KEGG	hsa01521	EGFR tyrosine kinase inhibitor resistance	0.000186018	0.012937	0.00953256
KEGG	hsa04810	Regulation of actin cytoskeleton	0.000215617	0.012937	0.00953256
KEGG	hsa04371	Apelin signaling pathway	0.00093923	0.0281769	0.0207619
KEGG	hsa04151	PI3K-Akt signaling pathway	0.00135748	0.0325795	0.0240059
KEGG	hsa05230	Central carbon metabolism in cancer	0.00462133	0.0837099	0.061681
GO：Gene Ontology；KEGG: Kyoto Encyclopedia of Genes and Genome

## Sheet: ST 7
ST 7. GSEA enrichment analyses
Description	enrichmentScore	NES	pvalue	p.adjust	qvalues
WP_HEDGEHOG_SIGNALING_PATHWAY	-0.583001	-2.04141	0.002079	0.13827	0.128241
WP_PI3KAKT_SIGNALING_PATHWAY	-0.282992	-1.41512	0.00218818	0.13827	0.128241
WP_MAPK_AND_NFKB_SIGNALLING_PATHWAYS_INHIBITED_BY_YERSINIA_YOPJ	0.656558	1.71132	0.00604839	0.205743	0.190821
WP_TNF_ALPHA_SIGNALING_PATHWAY	0.353103	1.46422	0.011976	0.265036	0.245813
REACTOME_HEDGEHOG_ON_STATE	-0.370852	-1.52717	0.0144628	0.265036	0.245813
PID_HEDGEHOG_2PATHWAY	-0.540882	-1.66058	0.0155642	0.270242	0.250641
GSEA：Gene Set Enrichment Analysis
